# Supplementary material for: Interference of Past Soil Contaminations in the Biomonitoring of PCB Emissions from a Recovered Derived Fuels (RDFs) Co-Powered Cement Plant
Source: MDPI journal article supplement (doi:10.3390/pollutants3010002), 2022-12-29
Supplement: s1 [file s1]

# **Interference of past soil contaminations on the biomonitoring of PCB emissions from a Recovered Derived Fuels (RDF) co-powered cement plant**

Lorenzo Fortuna<sup>1</sup> and Mauro Tretiach<sup>2,\*</sup>

<sup>1</sup>Department of Engineering and Architecture, University of Trieste, Via A. Valerio 6/1, I-34127 Trieste, Italy;

<sup>2</sup>Department of Life Sciences, University of Trieste, Via L. Giorgieri 10, I-34127 Trieste, Italy;

corresponding author:

Prof. Mauro Tretiach,

email: [tretiach@units.it](mailto:tretiach@units.it)

## **Supplementary materials**

**Supplementary Table S1.** Resume of the studies carried between 2016 and 2019 aimed at assessing the distribution of polychloro byphenyls and polychloro dibenzo dioxins/furans near the main potential sources of the study area of Fig. 1, i.e. the cement plant and the industrial park.

| Study      | Matrix                                         | Area               | Sites   | Sampling design                                           | Ancillary data                                                                                                                                |
|------------|------------------------------------------------|--------------------|---------|-----------------------------------------------------------|-----------------------------------------------------------------------------------------------------------------------------------------------|
| Grim 2016  | Fat tissue of hens                             |                    | 18      | Preferential                                              | -                                                                                                                                             |
| ARPA 2018  | upper soils (0-5 cm)<br>lower soils (10-25 cm) | 28 km <sup>2</sup> | 11      | Line transect sampling along fallout deposition gradients | Air particle distribution as predicted by atmospheric dispersion models simulating the emission from the cement plant and the industrial park |
| ARPA 2019a | eggs<br>hen fodder                             | 41 km <sup>2</sup> | 16<br>6 | Random<br>Preferential                                    | -                                                                                                                                             |
| ARPA 2019b | Air particulate                                |                    | 4       | Preferential                                              | PCB concentrations in stack emissions of the cement plant; inventory of PCB distribution in the Alpine regions                                |

**Supplementary Table S2.** Summary of the polychlorinated biphenyls concentrations (pg ncm<sup>-1</sup>) measured in stack emissions of the cement plant during February, July and October 2018 and May 2019. Congeners are order according to their homologous group: from tri- to epta-chlorinated biphenyls (3CB-7CB). Data from ARPA 2019a (see references). - : congener not measured

| Homologous group /<br>PCB congener | February 18 | July 18 | October 18 | May 19  |
|------------------------------------|-------------|---------|------------|---------|
| <b>3CB</b>                         |             |         |            |         |
| 28                                 | -           | -       | -          | 2171.7  |
| <b>4CB</b>                         |             |         |            |         |
| 52                                 | -           | -       | -          | 2704.6  |
| 77                                 | 8.1         | 29.1    | 527.6      | 1559.7  |
| 81                                 | 2.1         | 4.8     | 121.2      | 51.9    |
| <b>5CB</b>                         |             |         |            |         |
| 101                                | -           | -       | -          | 9677.3  |
| 105                                | 14.8        | 31.5    | 48.8       | 1520.8  |
| 114                                | 1.1         | 2.3     | 3.6        | 76.5    |
| 118                                | 149         | 292     | 139.5      | 6968.8  |
| 123                                | 5.3         | 16.4    | 21.2       | 206.1   |
| 126                                | 2           | 2.5     | 3.4        | 239.9   |
| <b>6CB</b>                         |             |         |            |         |
| 138                                | -           | -       | -          | 16307.7 |
| 153                                | -           | -       | -          | 19597   |
| 156                                | 5.2         | 8.2     | 10.4       | 1012.6  |
| 157                                | 1.4         | 2.3     | 2.7        | 99.8    |
| 167                                | 2.4         | 5.9     | 6.6        | 619.7   |
| 169                                | 0.7         | 1.2     | 0.8        | 3.9     |
| <b>7CB</b>                         |             |         |            |         |
| 180                                | -           | -       | -          | 4544.3  |
| 189                                | 0.8         | 0.9     | 1.5        | 31.1    |

**Supplementary Table S3.** Results of the regression analysis carried out between the distance of the cement plant and the industrial park from the 37 sampling sites of Fig. 1 and the concentration sums of the 12 dioxin-like ( $\Sigma_{12}$  DL-PCB), 20 non-dioxin-like ( $\Sigma_{20}$  NDL-PCB), and all 32 PCB congeners ( $\Sigma_{32}$  PCB) calculated for the *Robinia pseudoacacia* leaf samples.  $\beta_0$  and  $\beta_1$  are the regression parameters whereas  $R^2$  is the coefficient of determination. Number in brackets are the p-value associated to regression parameters. Note that regression parameters are not significant and that  $R^2$  is very low.

|                        | $\Sigma_{12}$<br>DL-PCB | $\Sigma_{20}$<br>NDL-PCB | $\Sigma_{32}$<br>PCB |
|------------------------|-------------------------|--------------------------|----------------------|
| <b>Cement-plant</b>    |                         |                          |                      |
| $\beta_0$              | 21.09<br>(0.306)        | 4.91<br>(0.229)          | 17.88<br>(0.280)     |
| $\beta_1$              | -0.004<br>(0.664)       | 0.000<br>(0.929)         | -0.003<br>(0.696)    |
| $R^2$                  | 0.016                   | 0.001                    | 0.009                |
| <b>Industrial park</b> |                         |                          |                      |
| $\beta_0$              | 12.76<br>(0.533)        | 4.49<br>(0.253)          | 9.70<br>(0.560)      |
| $\beta_1$              | 0.000<br>(0.989)        | 0.000<br>(0.827)         | 0.001<br>(0.877)     |
| $R^2$                  | 0.000                   | 0.007                    | 0.001                |

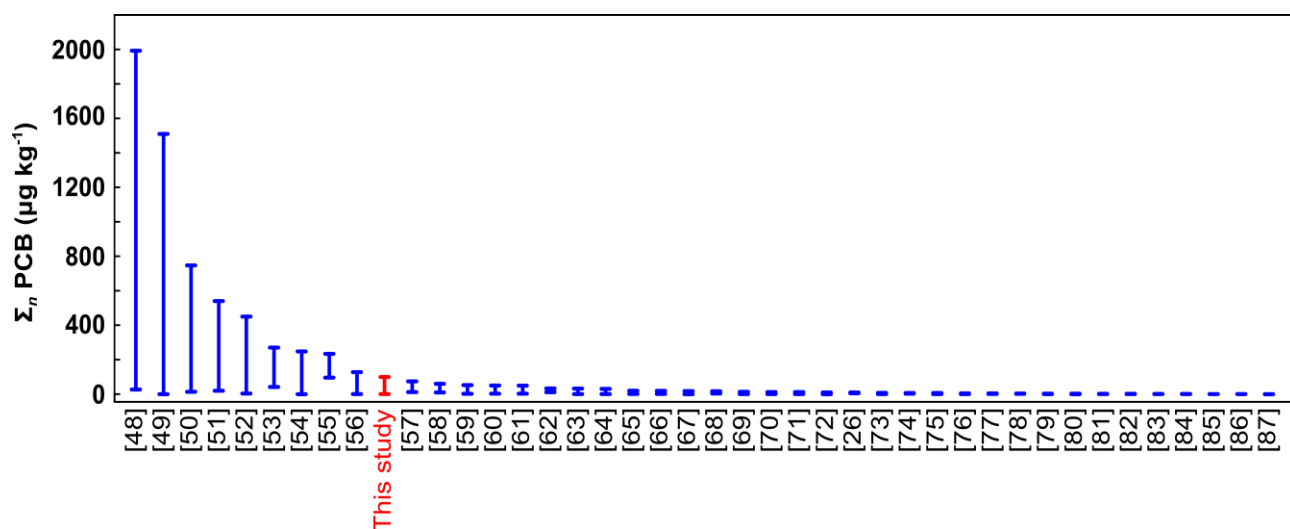

**Supplementary Figure S1.** Comparison between the range of PCB concentration values measured in *Robinia pseudoacacia* samples (this study, in red) and those reported in other 41 studies based on the use of leaves of deciduous broadleaved, evergreen broadleaved and coniferous species as biomonitor of airborne PCB.
