# Supplementary material for: Interference of Past Soil Contaminations in the Biomonitoring of PCB Emissions from a Recovered Derived Fuels (RDFs) Co-Powered Cement Plant
Source: MDPI journal article supplement (doi:10.3390/pollutants3010002), 2022-12-29
Supplement: s1 [file s1]

Archive with 1 entries (1 files):
- pollutants-2087375-supplementary.pdf
